# Supplementary material for: Vendor-Specific Microbiomes Influence Oral Cancer Development and Its Response to a Bacterial Intervention in Mice
Source: Research Square preprint supplement (doi:10.21203/rs.3.rs-6907759/v1), 2025-07-27
Supplement: Supplementary file [file 0c927c8867fd53b8fc88bc0b.pdf]

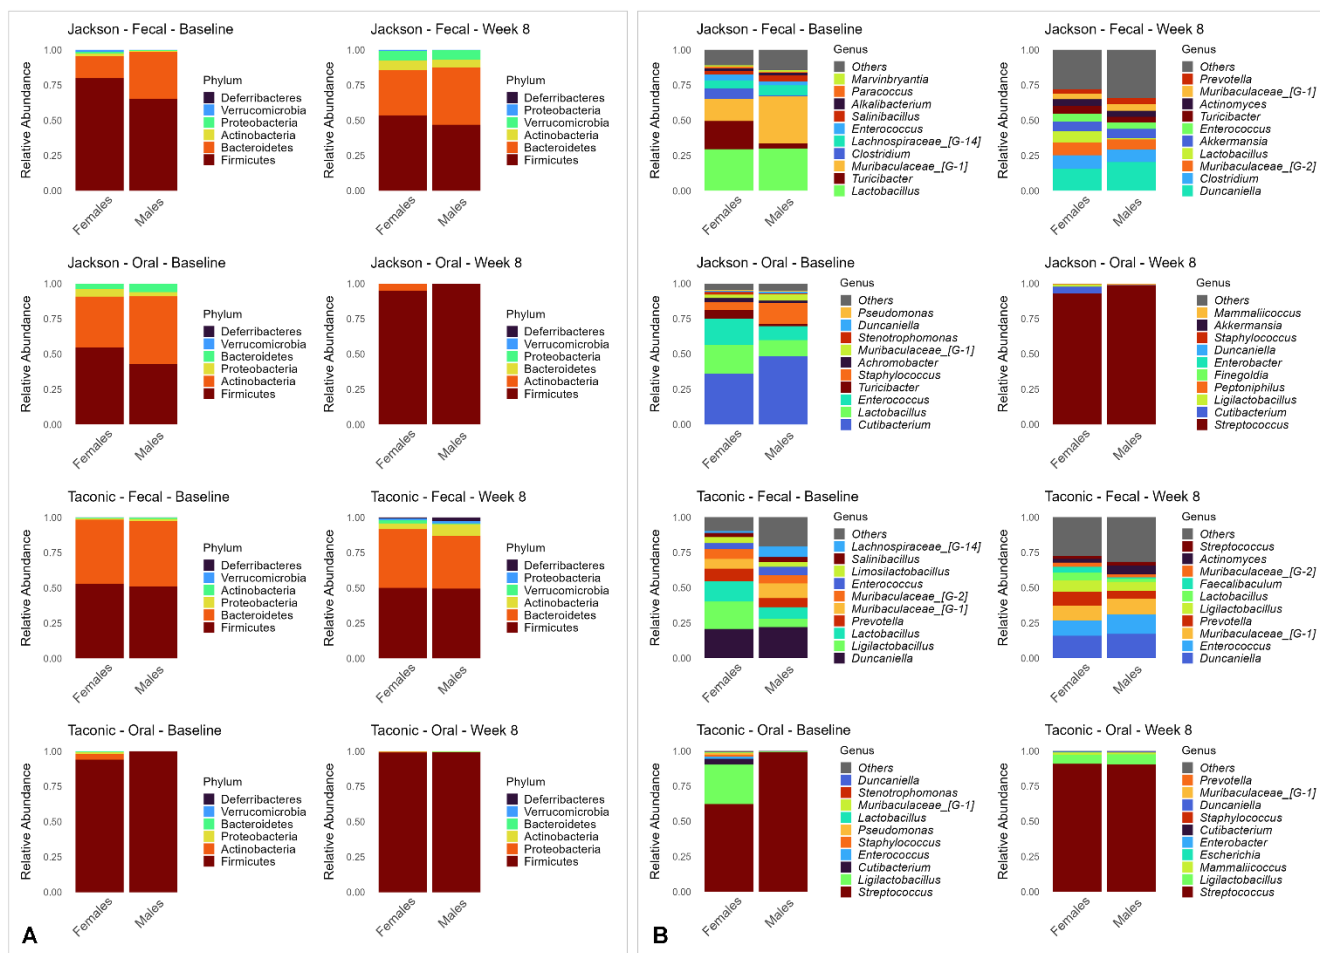

**Supplementary Figure 1. Phylum-level (A) and genus-level (B) taxonomy profiles by sex stratified by vendor, sample type, and 4-NQO treatment (time points).** DNA extracted from oral swab or fecal samples was sequenced for V1-V3 regions of the 16S rRNA gene using paired-end chemistry. Merged, quality-filtered were assigned taxonomies using a BLASTn-based algorithm. Stacked bars represent the average relative abundances of all the identified phyla and top 10 genera across samples. The plots were generated with R.

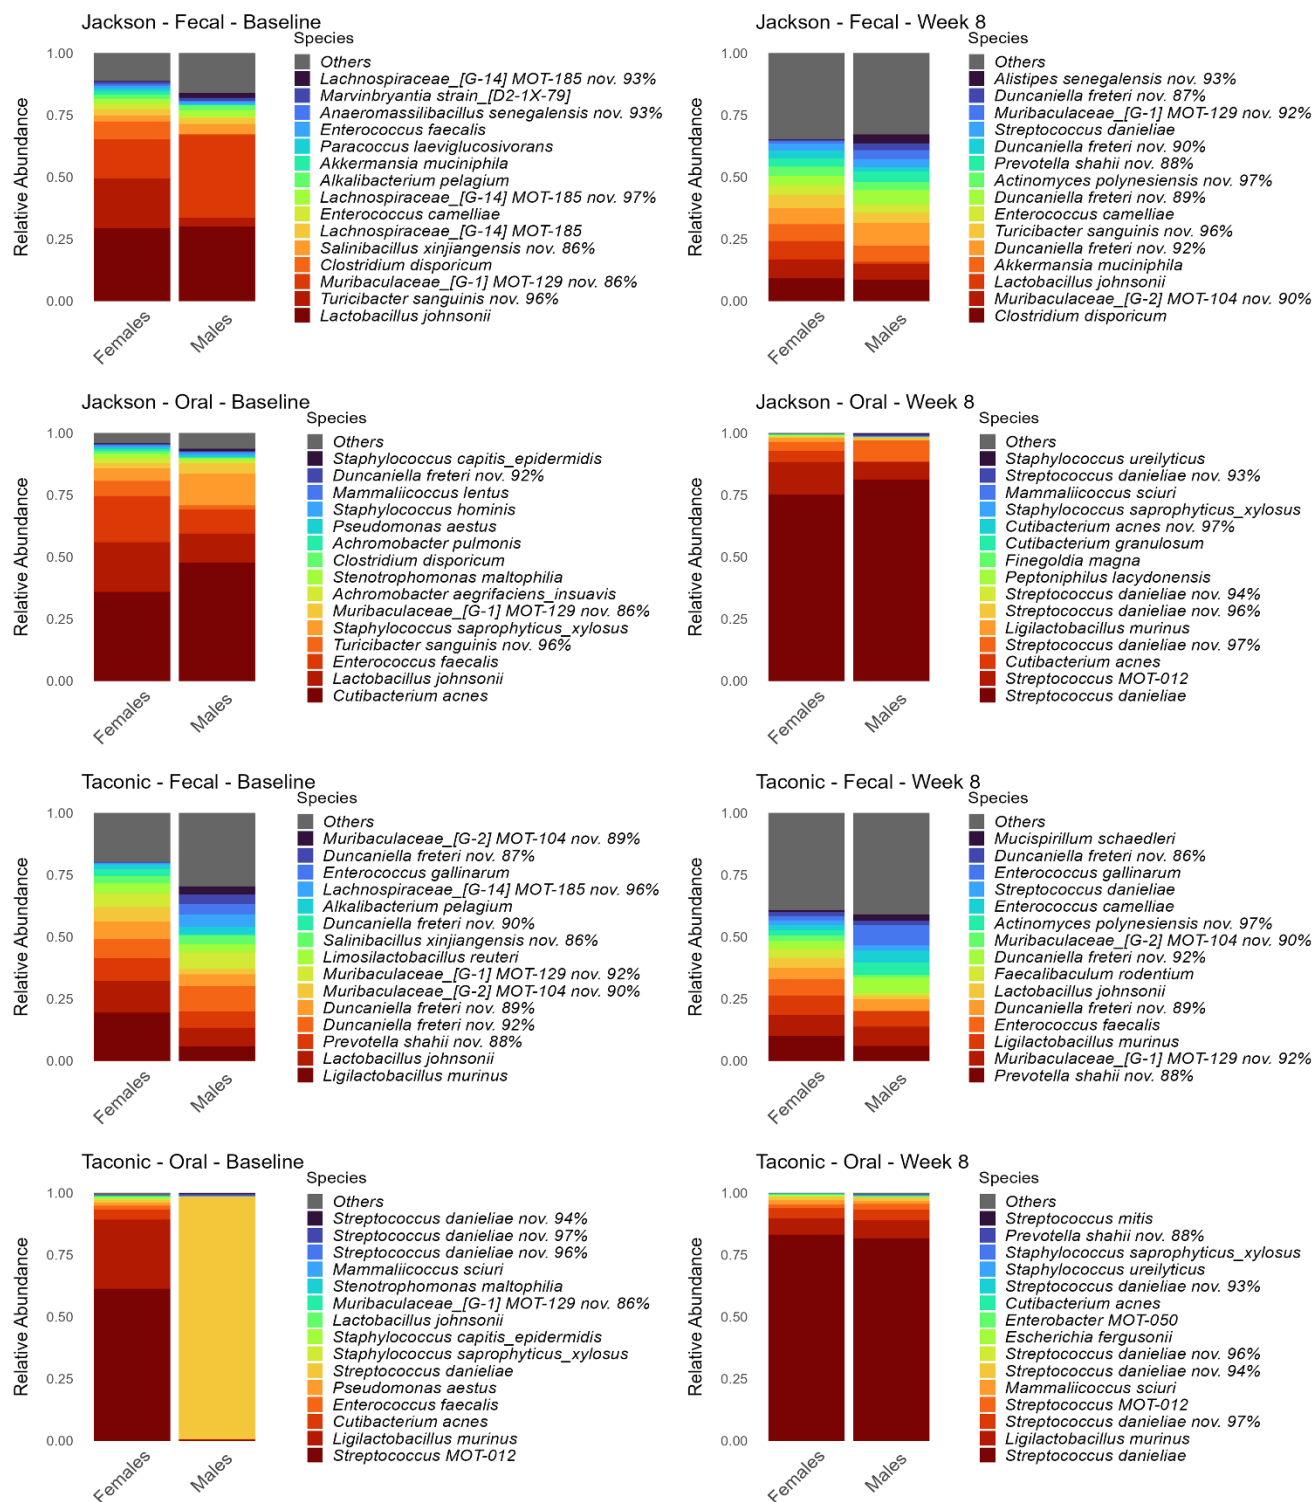

**Supplementary Figure 2. Species-level taxonomy profiles by sex stratified by vendor, sample type, and 4-NQO treatment (time points).** DNA extracted from oral swab or fecal samples was sequenced for V1-V3 regions of the 16S rRNA gene using paired-end chemistry. Merged, quality-filtered were assigned taxonomies using a BLASTn-based algorithm. Stacked bars represent the average relative abundances of top 15 species across samples. The plots were generated with R.

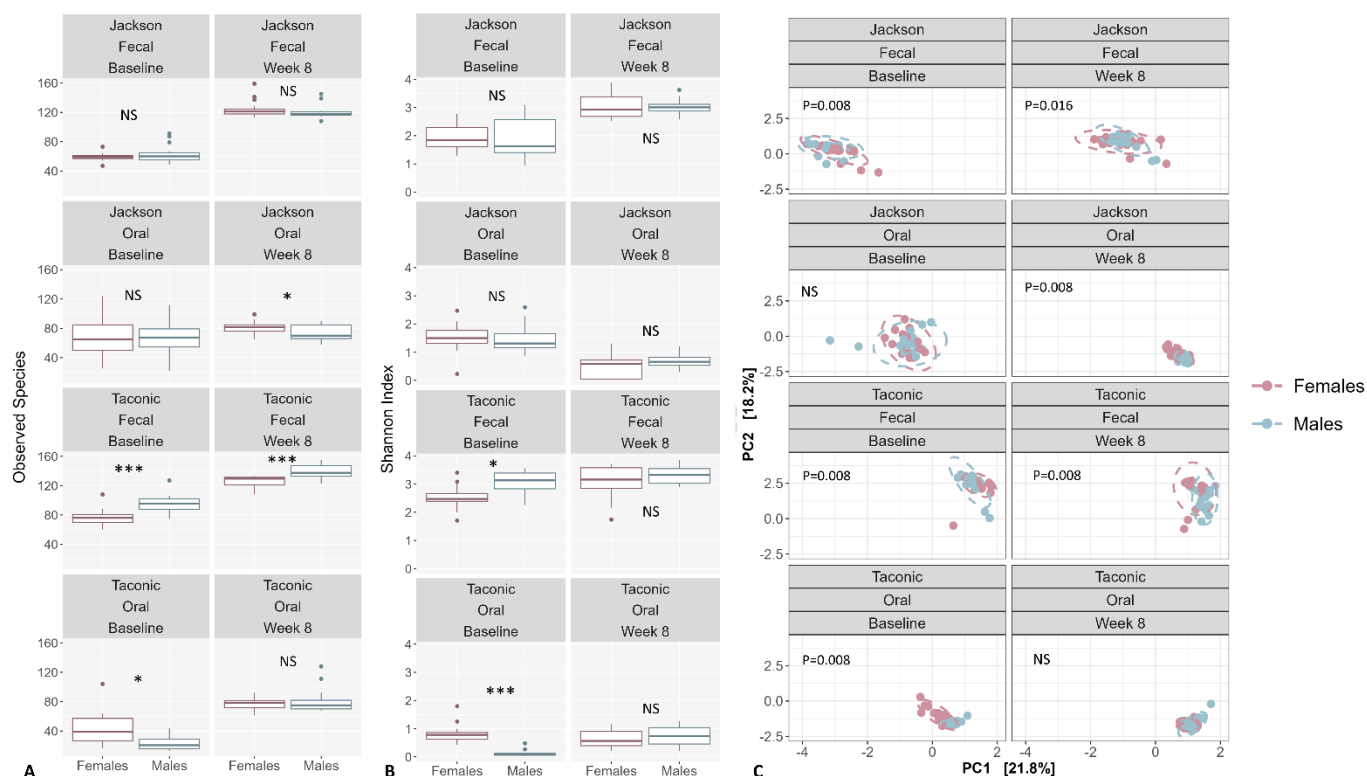

**Supplementary Figure 3. Species richness, alpha and beta-diversity by sex stratified by vendor, sample type, and 4-NQO treatment (time points).** Rarefied taxonomic profiles were used to calculate observed species (A) and Shannon's alpha diversity index (B). Statistical significance was assessed with t-test or Mann-Whitney test as appropriate. \* Adjusted p-value  $\leq 0.05$ ; \*\*\* Adjusted p-value  $\leq 0.001$ ; NS, not significant. Principle Component Analysis (C) was performed using Aitchison distances calculated from centered log-ratio (CLR) transformed taxonomic profiles. Statistical significance was sought using PERMANOVA; NS, not significant. The plots were generated with R.

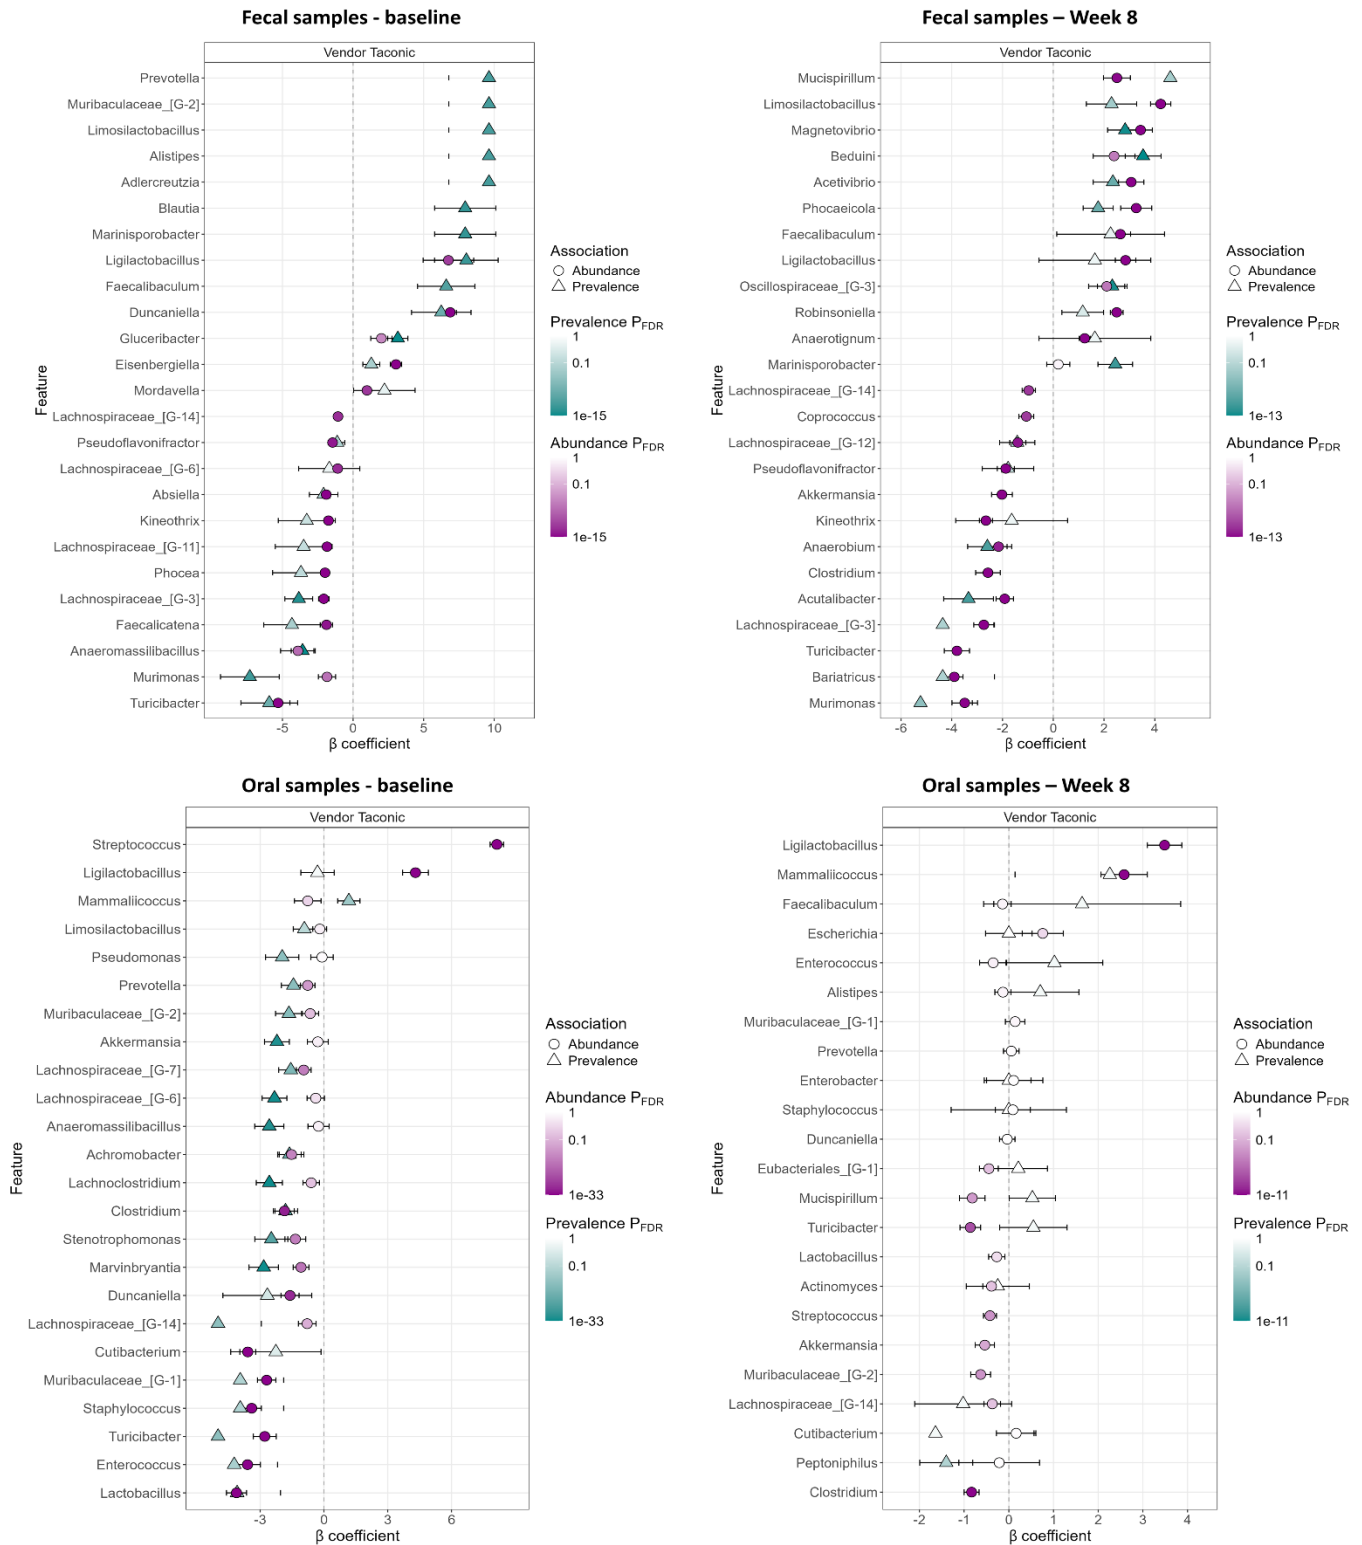

**Supplementary Figure 4. Differentially abundant/prevalent genera by vendor (Taonic vs. Jackson) stratified by sample type and 4NQO treatment (time point).** Centered log ratio (CLR) transformed data were analyzed with Multivariate Association with Linear Models (MaAsLin3 package in R) to identify differentially abundant genera ( $FDR \leq 0.1$ ).

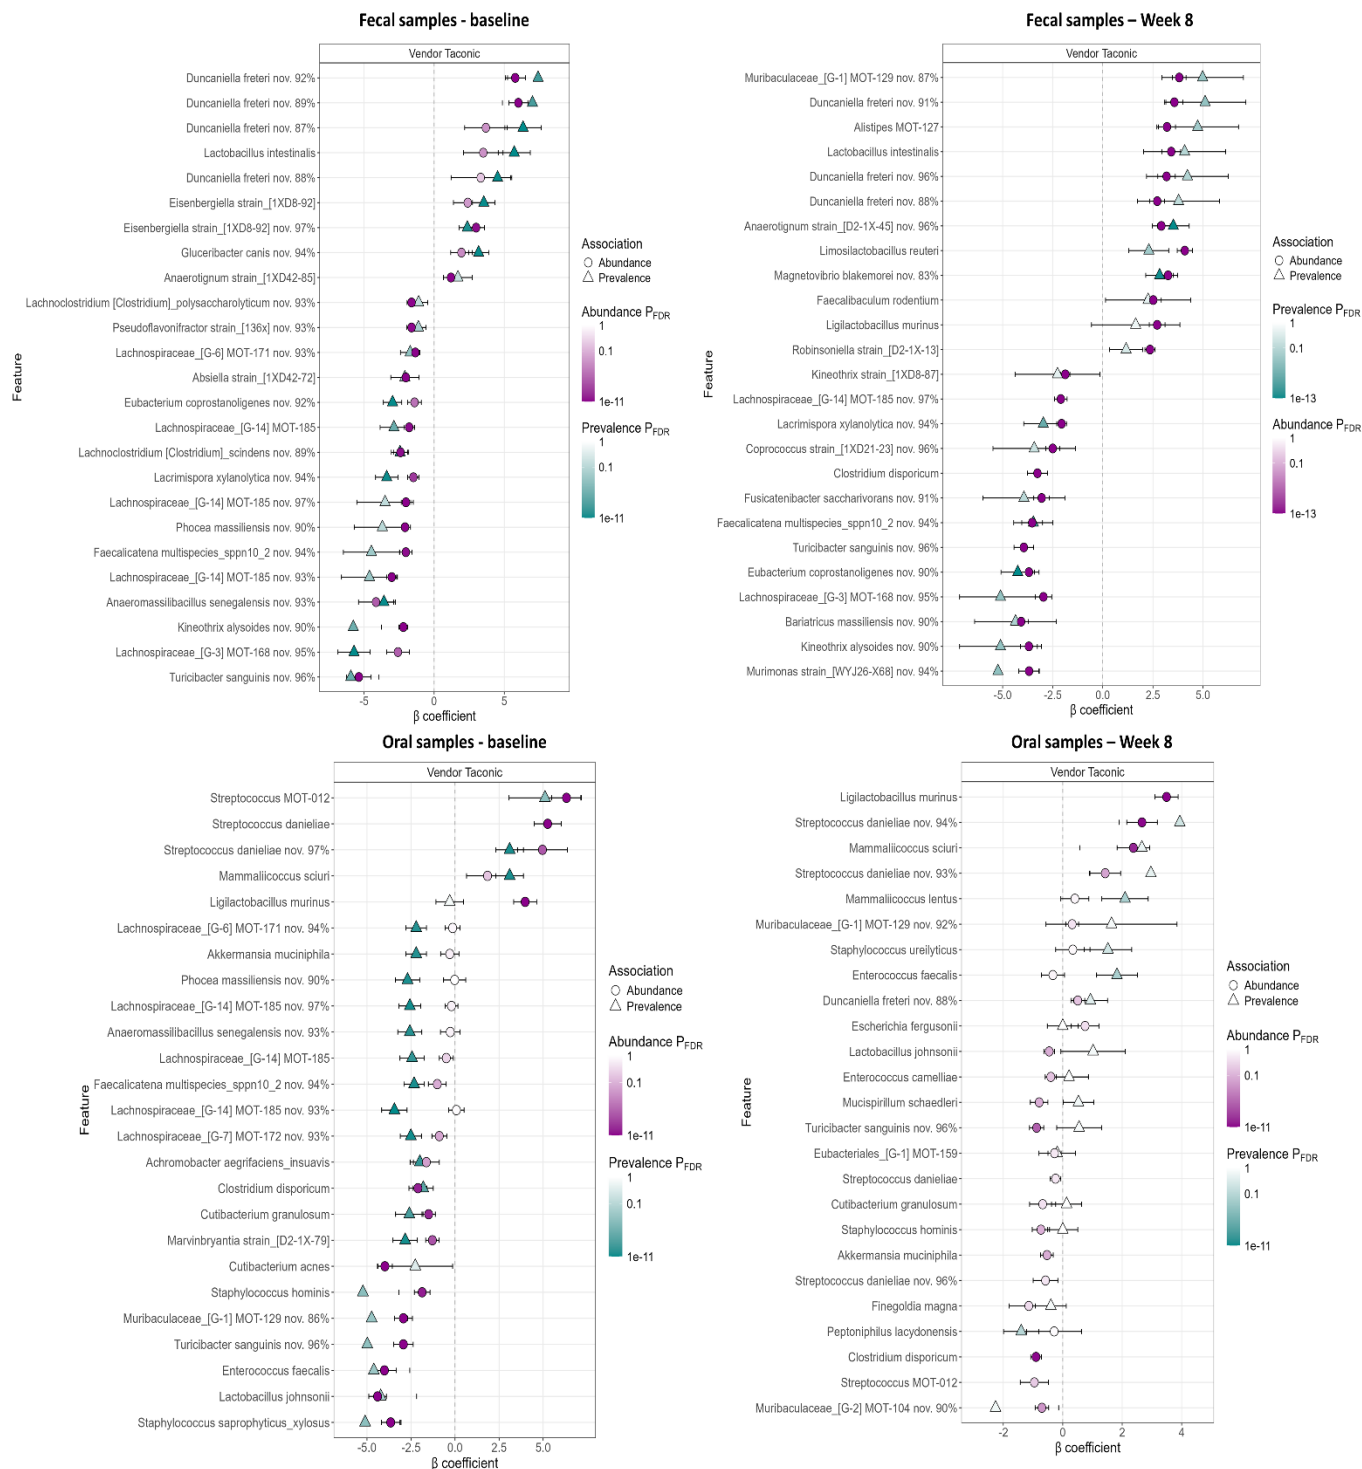

**Supplementary Figure 5. Differentially abundant/prevalent species by vendor (Taconic vs. Jackson) stratified by sample type and 4NQO treatment (time point).** Centered log ratio (CLR) transformed data were analyzed with Multivariate Association with Linear Models (MaAsLin3 package in R) to identify differentially abundant species ( $FDR \leq 0.1$ ).

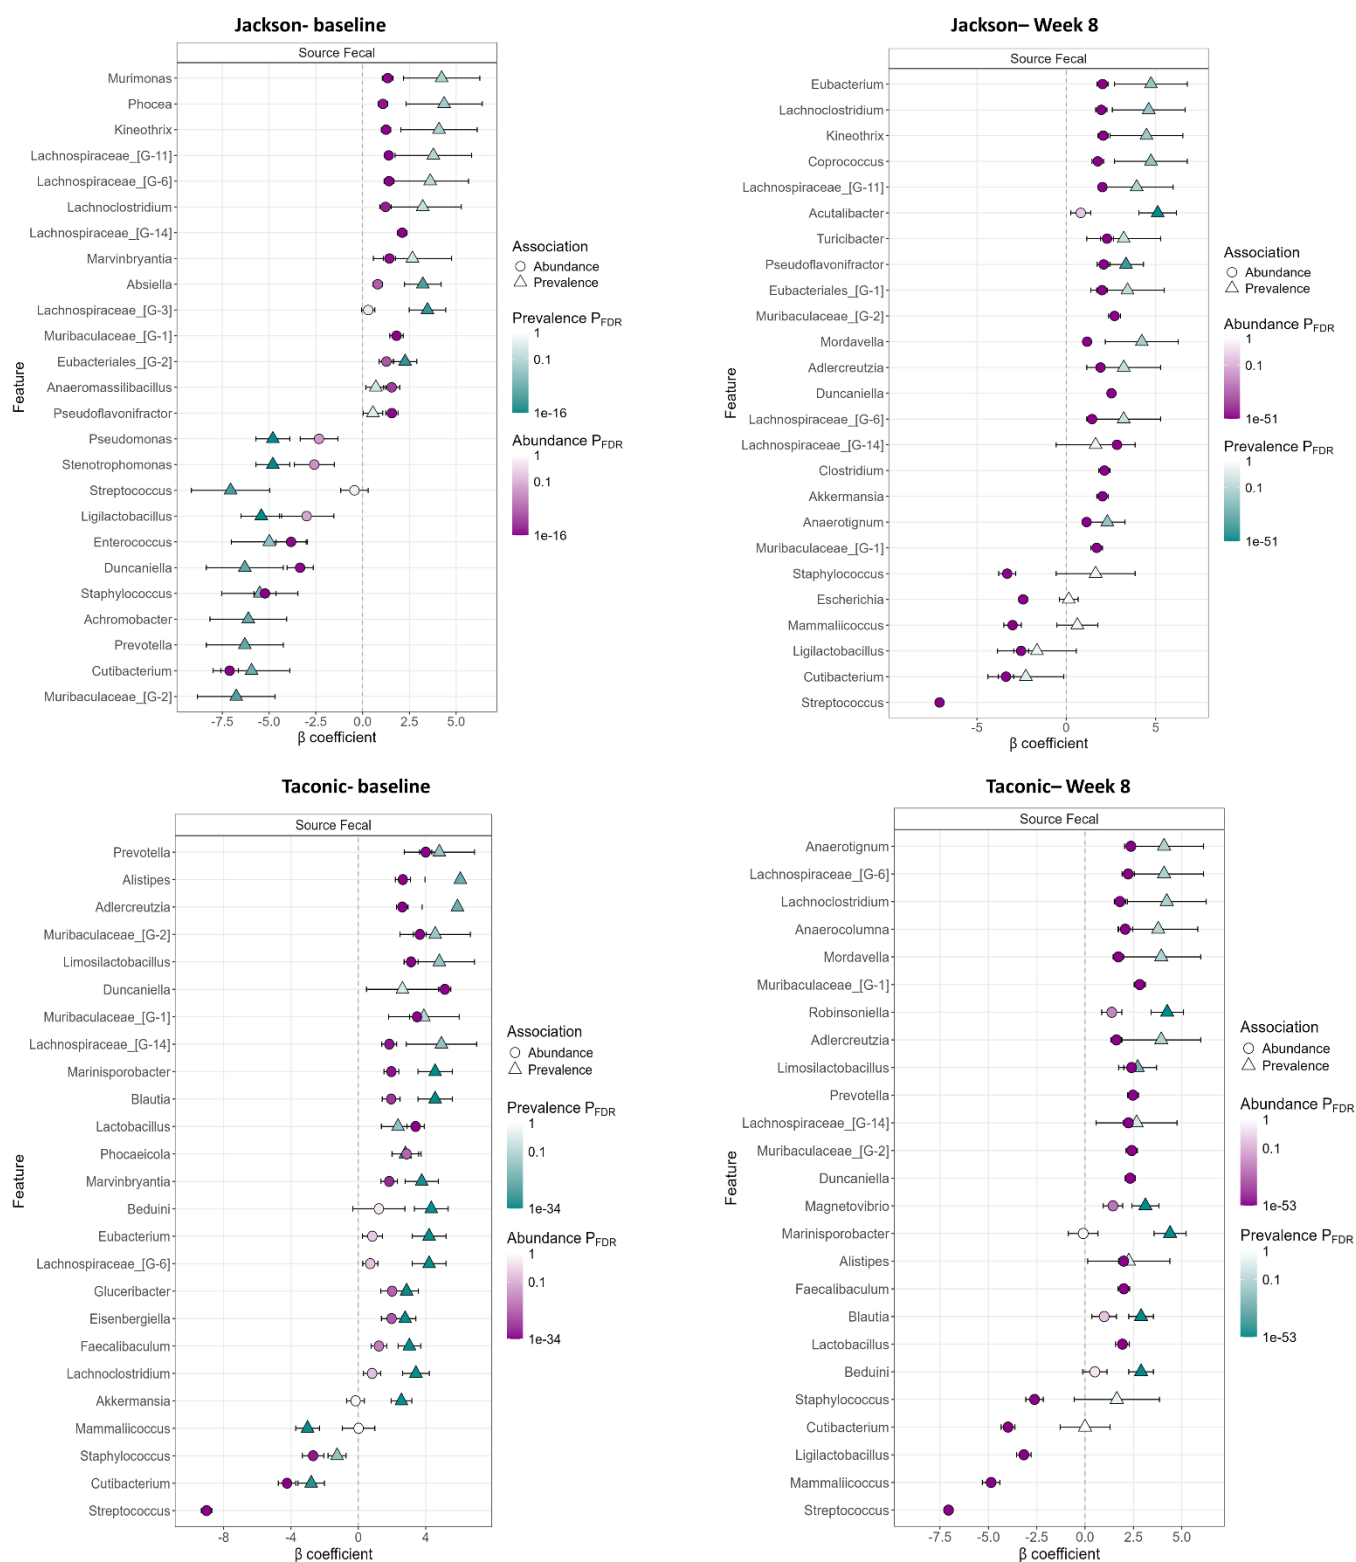

**Supplementary Figure 6. Differentially abundant/prevalent genera by sample type (Fecal vs. Oral) stratified by vendor and 4NQO treatment (time point).** Centered log ratio (CLR) transformed data were analyzed with Multivariate Association with Linear Models (MaAsLin3 package in R) to identify differentially abundant genera ( $FDR \leq 0.1$ ).



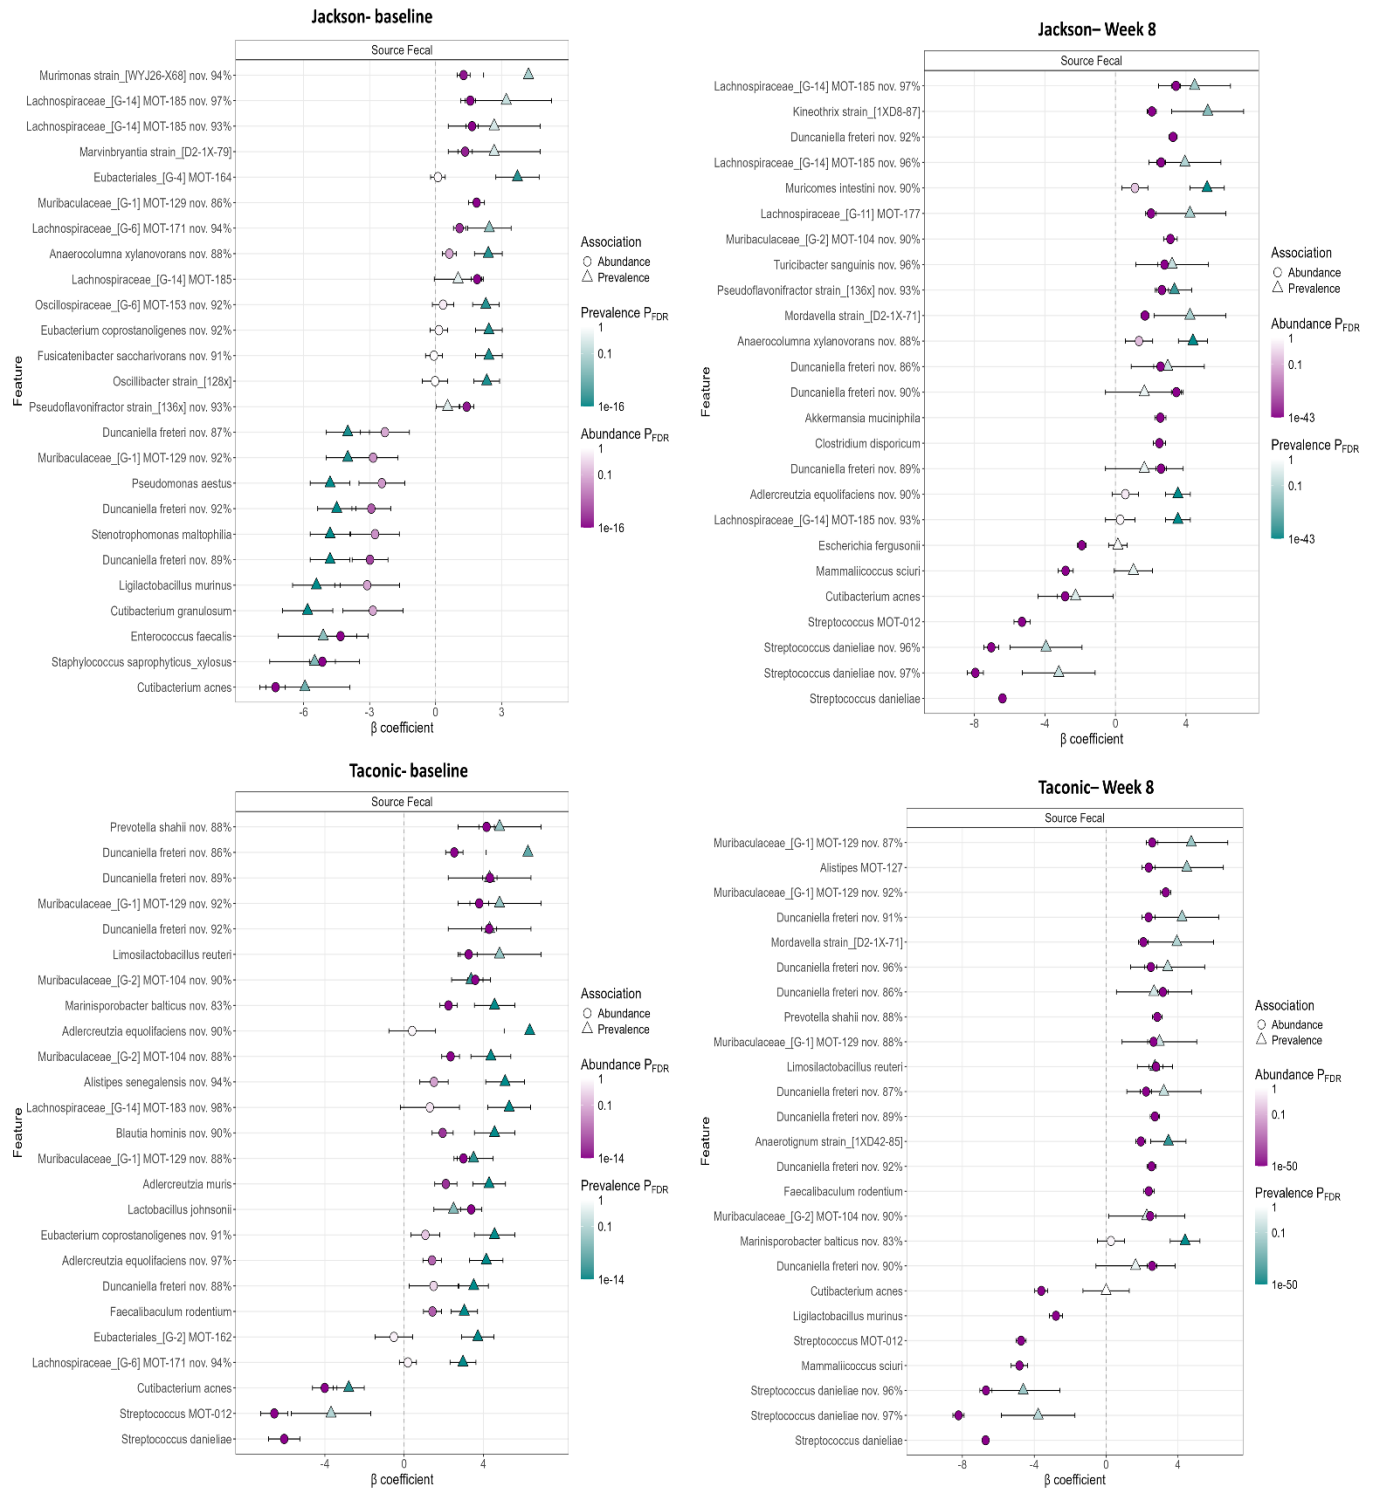

**Supplementary Figure 7. Differentially abundant/prevalent species by sample type (Fecal vs. Oral) stratified by vendor and 4NQO treatment (time point).** Centered log ratio (CLR) transformed data were analyzed with Multivariate Association with Linear Models (MaAsLin3 package in R) to identify differentially abundant species ( $FDR \leq 0.1$ ).

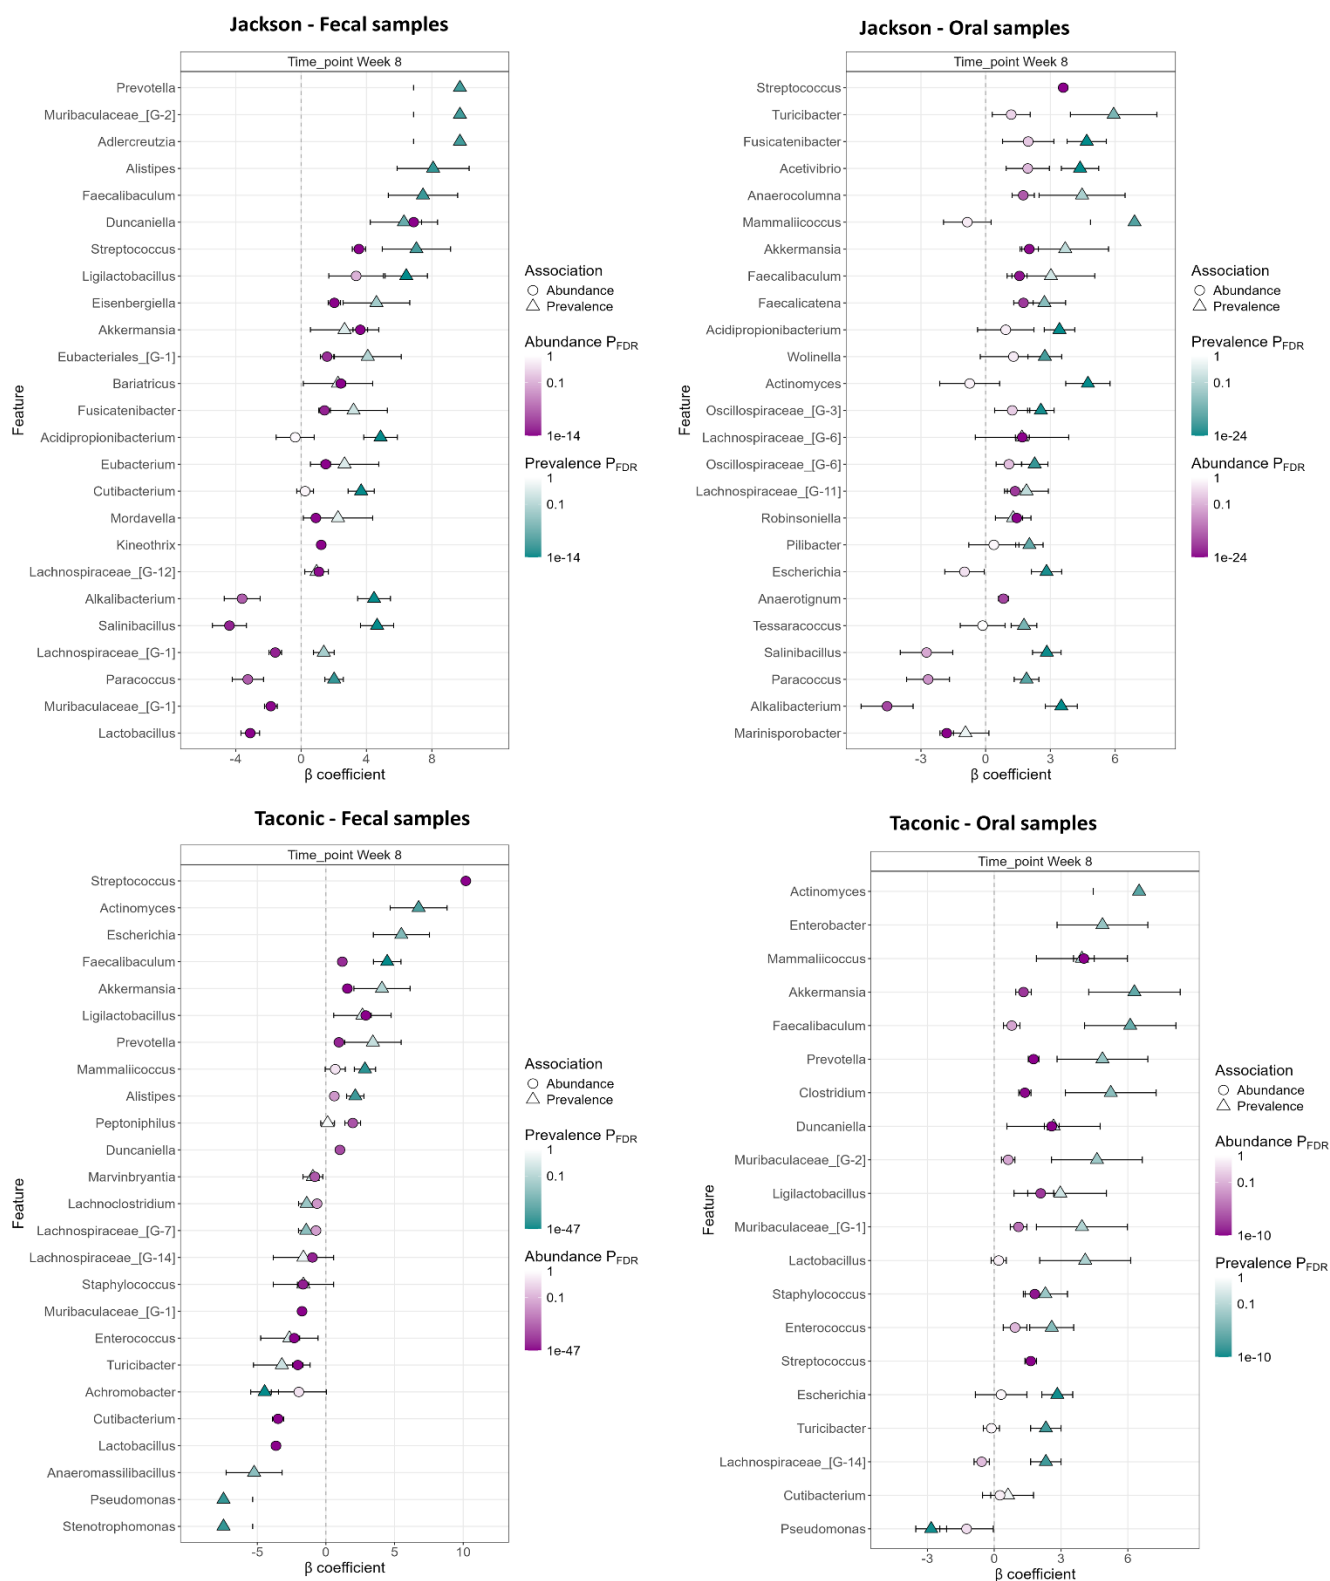

**Supplementary Figure 8. Differentially abundant/prevalent genera by 4NQO treatment (Baseline vs. Week 8) stratified by vendor and sample type.** Centered log ratio (CLR) transformed data were analyzed with Multivariate Association with Linear Models (MaAsLin3 package in R) to identify differentially abundant genera ( $FDR \leq 0.1$ ).



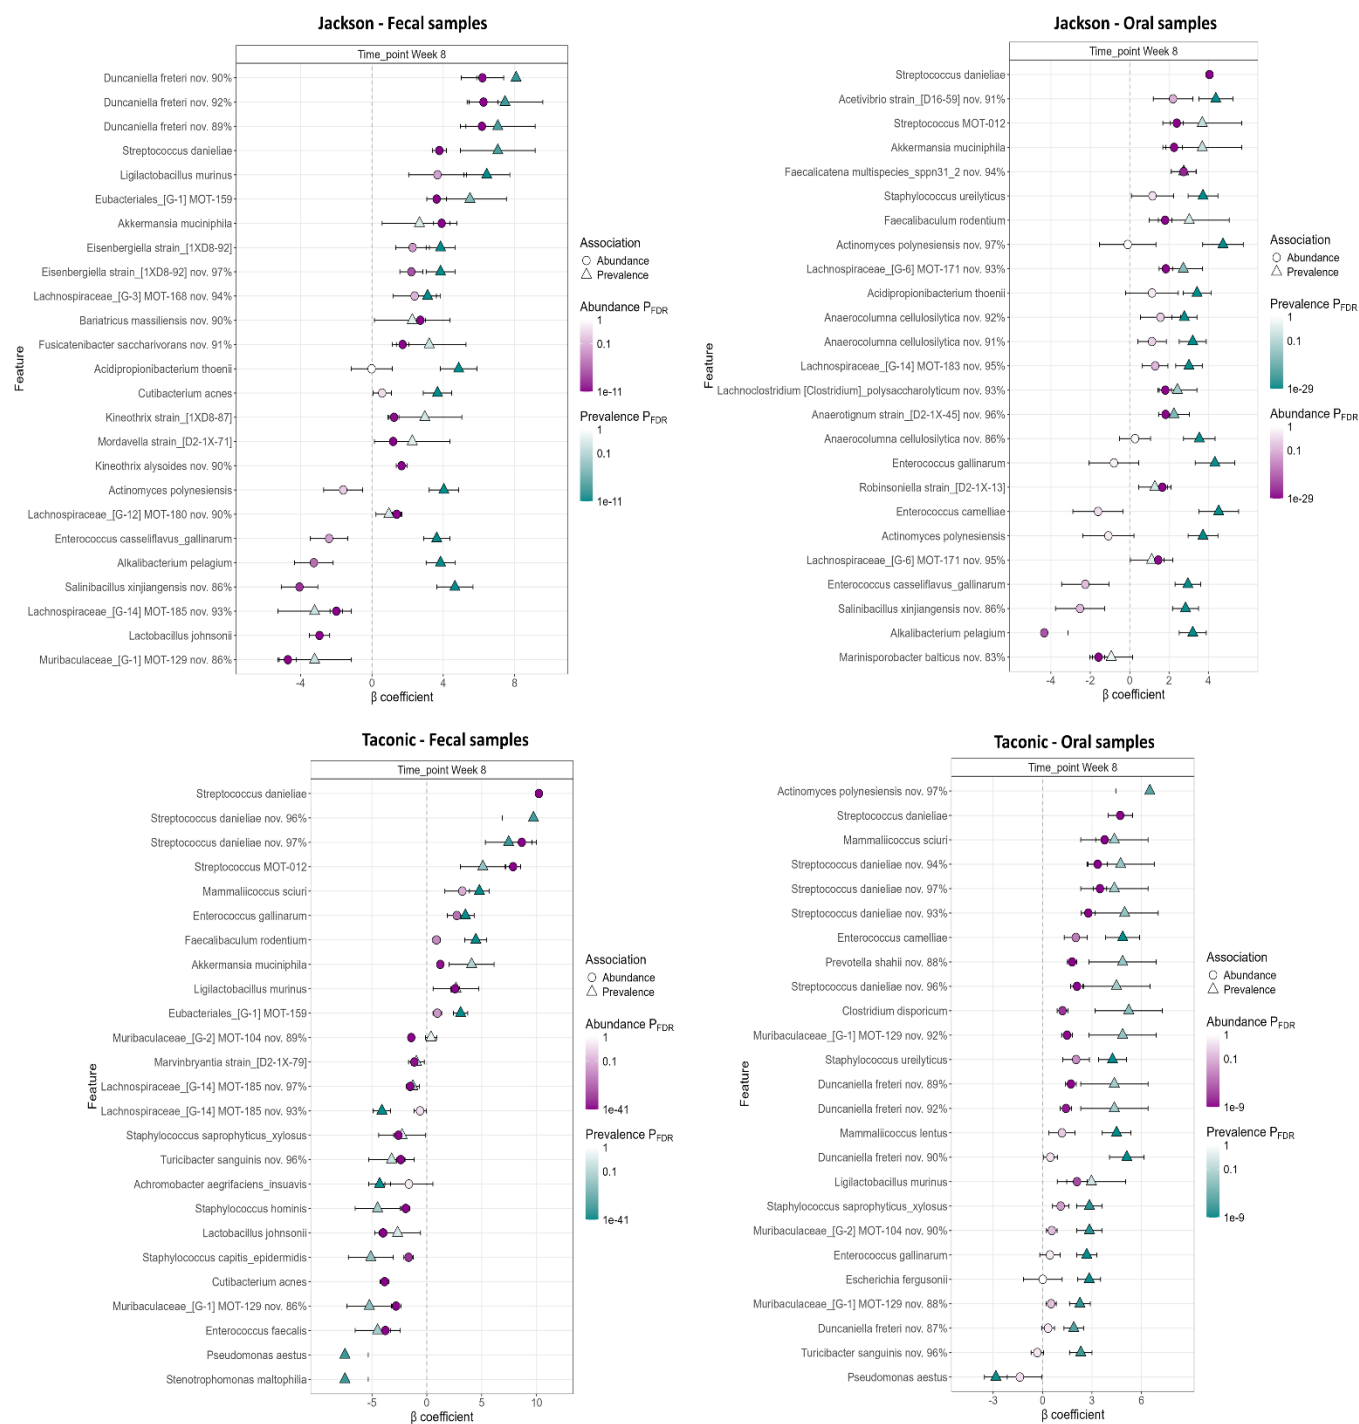

**Supplementary Figure 9. Differentially abundant/prevalent species by 4NQO treatment (Baseline vs. Week 8) stratified by vendor and sample type.** Centered log ratio (CLR) transformed data were analyzed with Multivariate Association with Linear Models (MaAsLin3 package in R) to identify differentially abundant species ( $FDR \leq 0.1$ ).

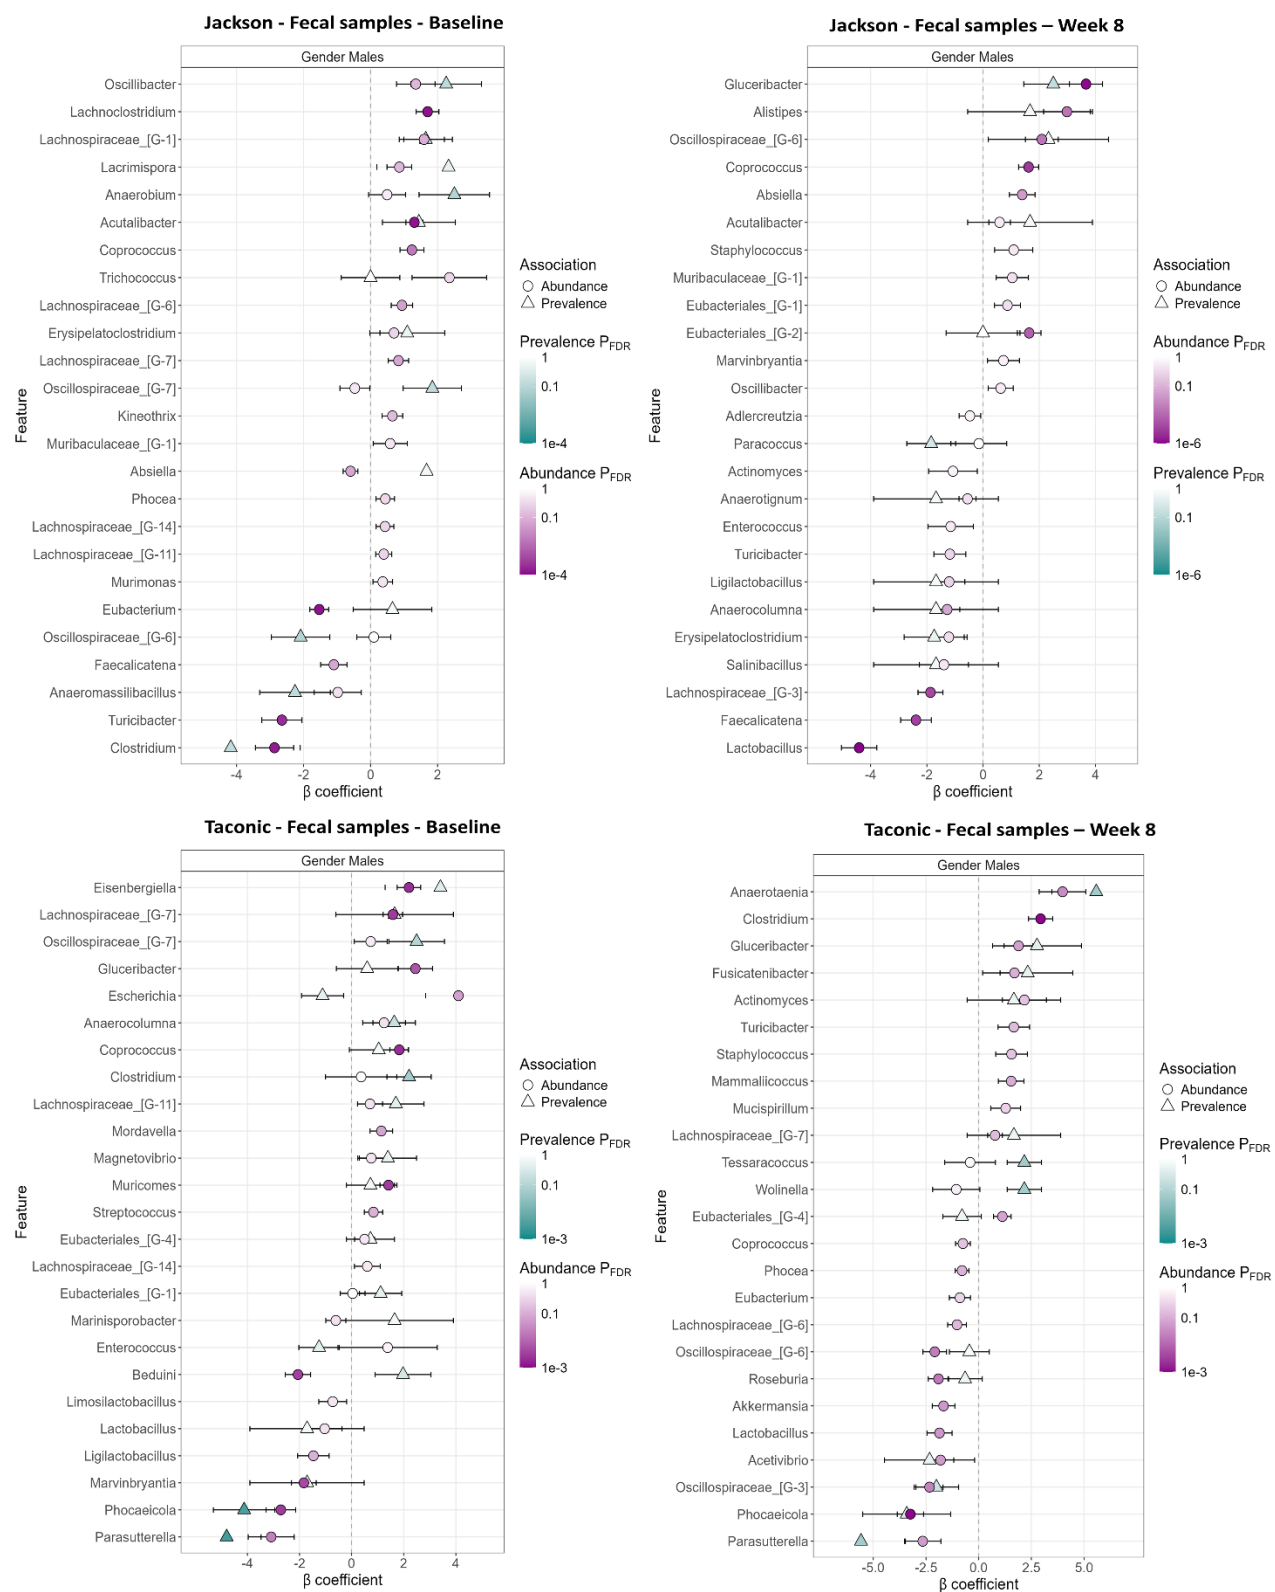

**Supplementary Figure 10. Differentially abundant/prevalent genera by sex (Males vs. Females) stratified by vendor and 4NQO treatment (time point) –Fecal samples.** Centered log ratio (CLR) transformed data were analyzed with Multivariate Association with Linear Models (MaAsLin3 package in R) to identify differentially abundant genera ( $FDR \leq 0.1$ ).

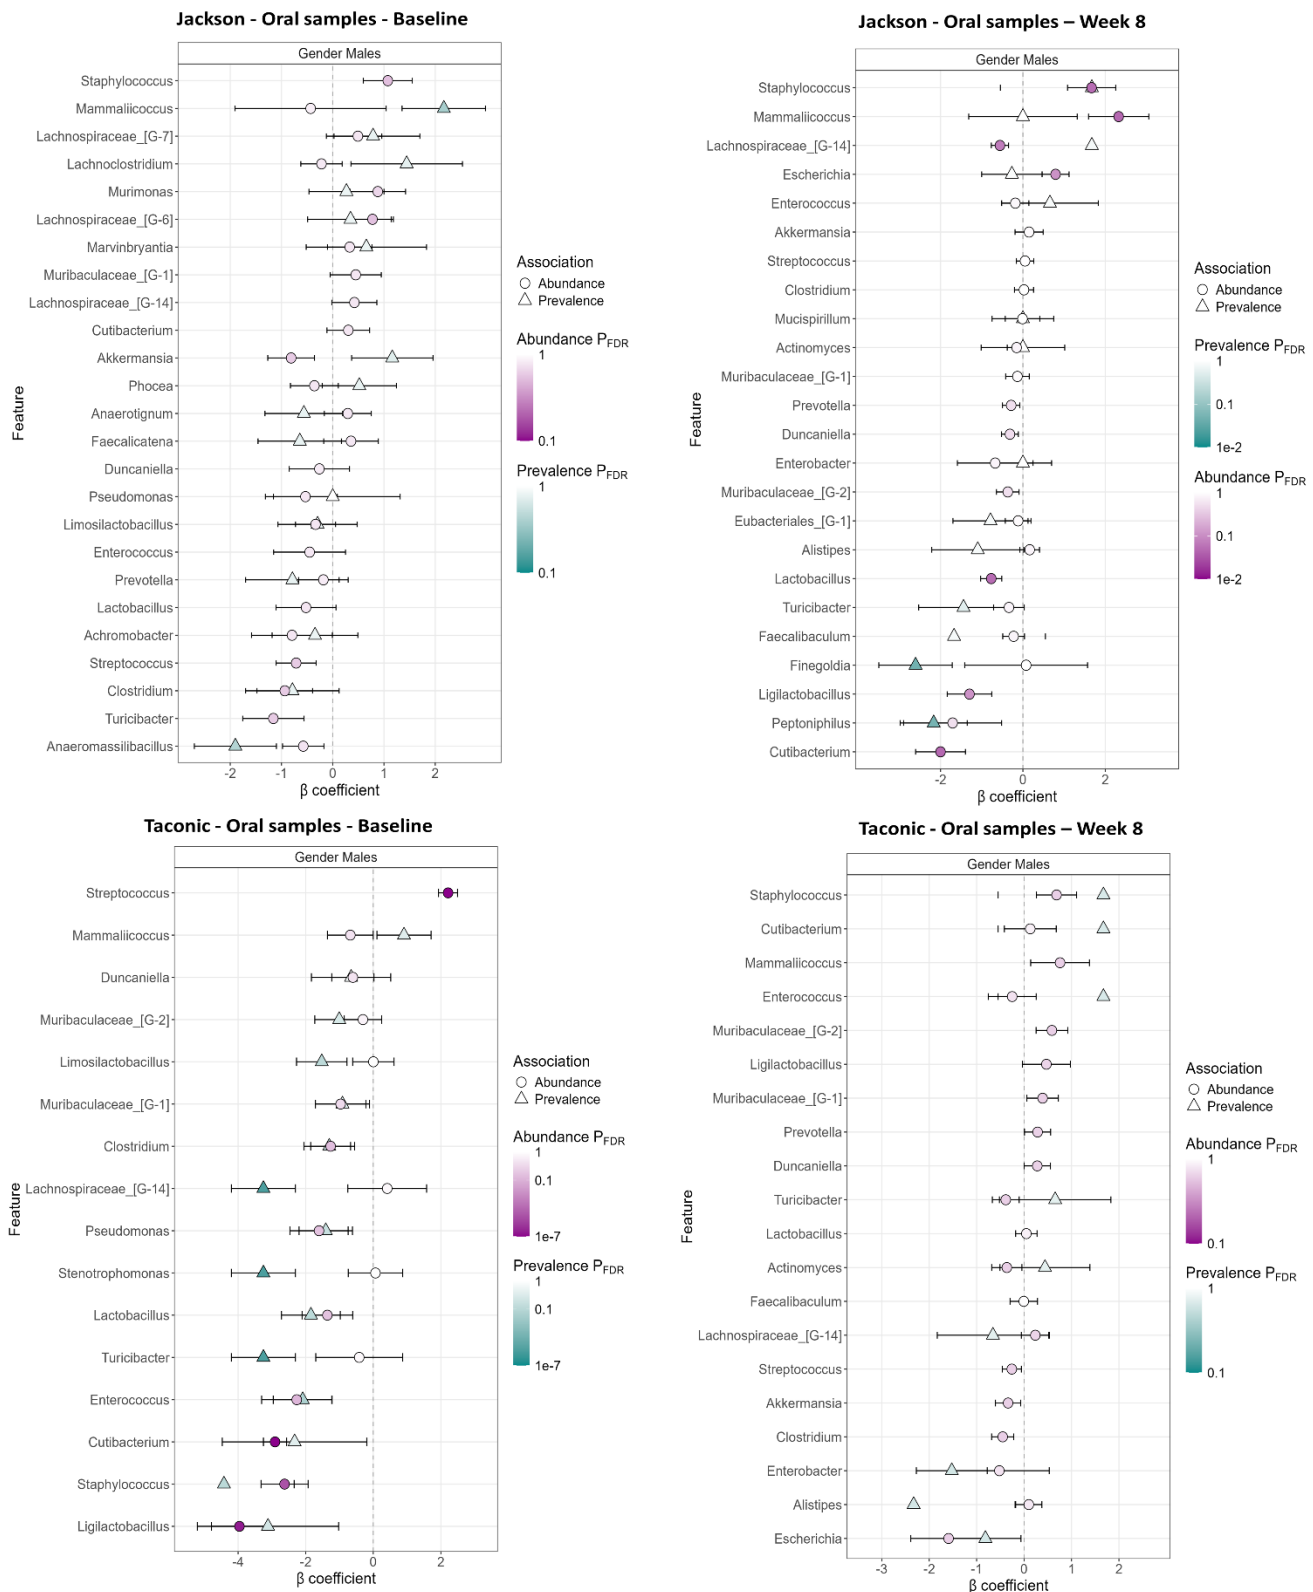

**Supplementary Figure 11. Differentially abundant/prevalent genera by sex (Males vs. Females) stratified by vendor and 4NQO treatment (time point) –Oral samples.** Centered log ratio (CLR) transformed data were analyzed with Multivariate Association with Linear Models (MaAsLin3 package in R) to identify differentially abundant genera ( $FDR \leq 0.1$ ).

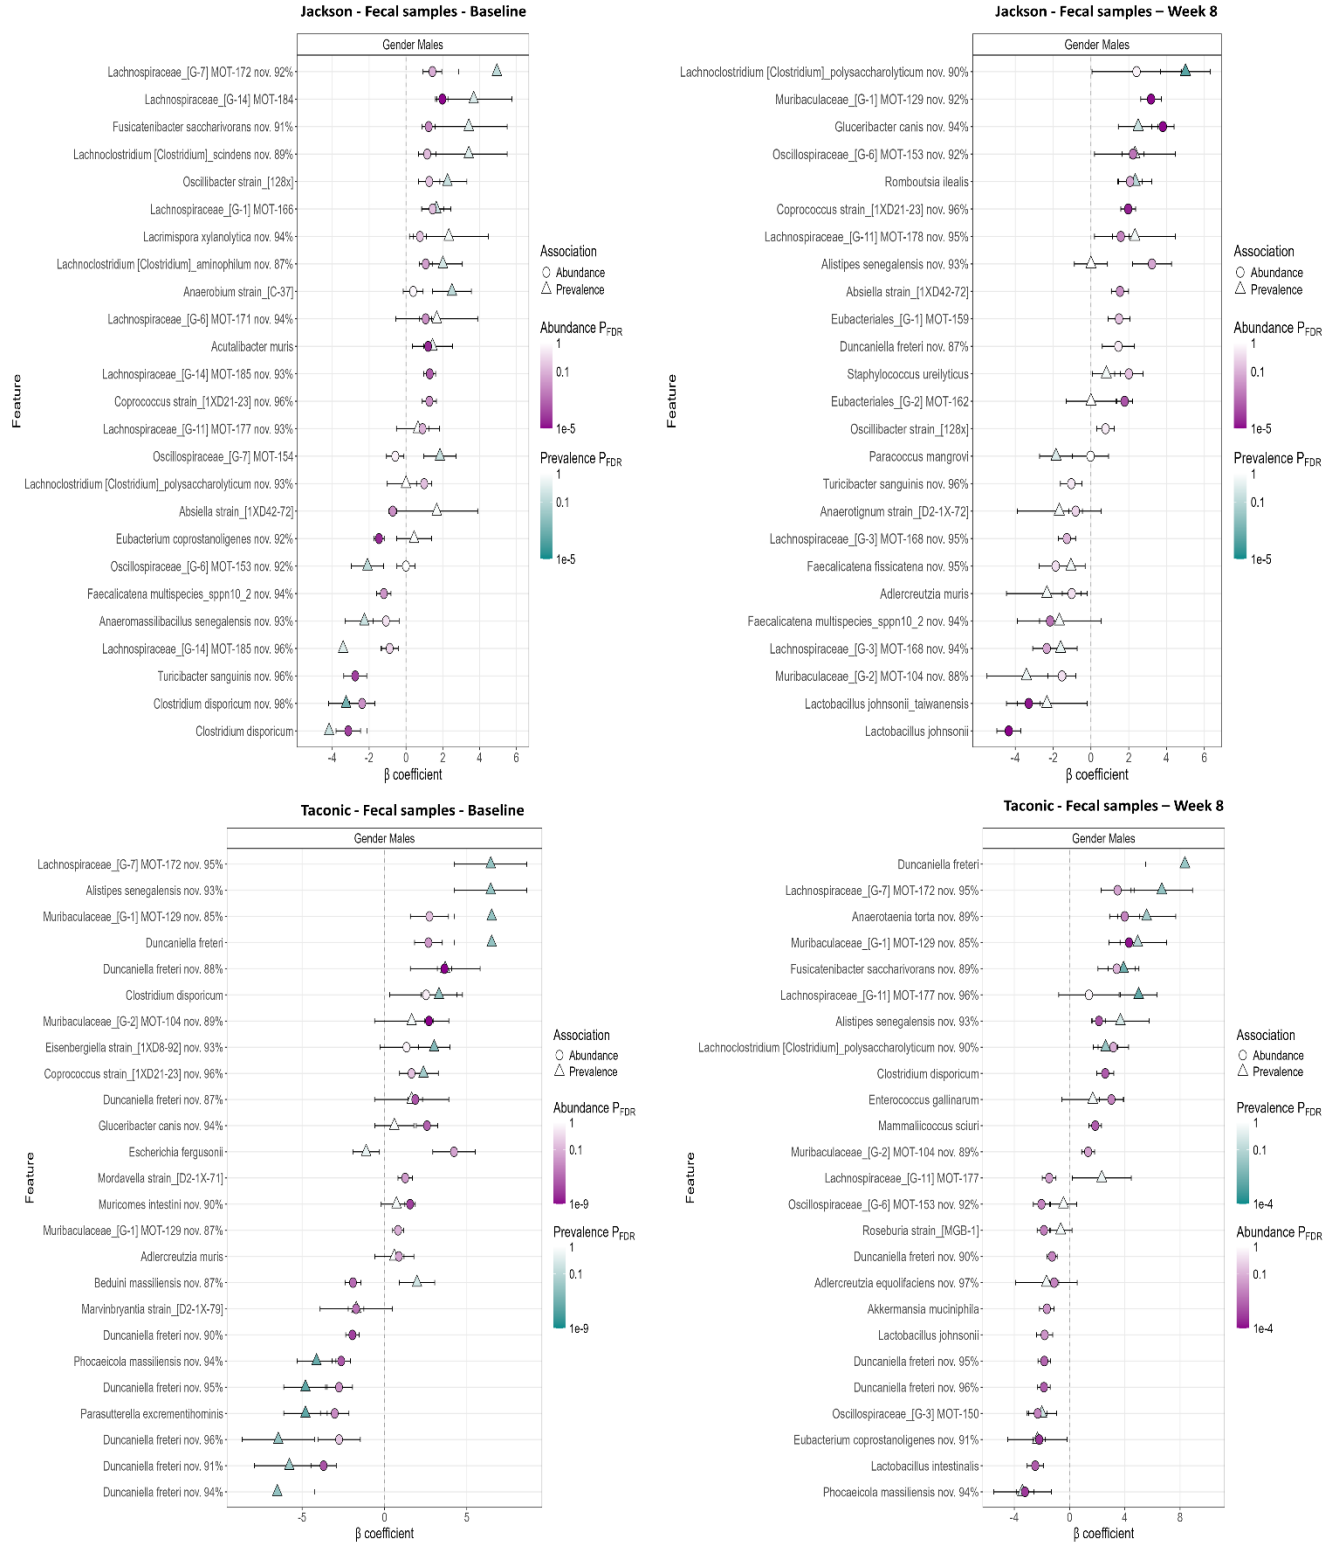

**Supplementary Figure 12. Differentially abundant/prevalent species by sex (Males vs. Females) stratified by vendor and 4NQO treatment (time point) –Fecal samples.** Centered log ratio (CLR) transformed data were analyzed with Multivariate Association with Linear Models (MaAsLin3 package in R) to identify differentially abundant species ( $FDR \leq 0.1$ ).

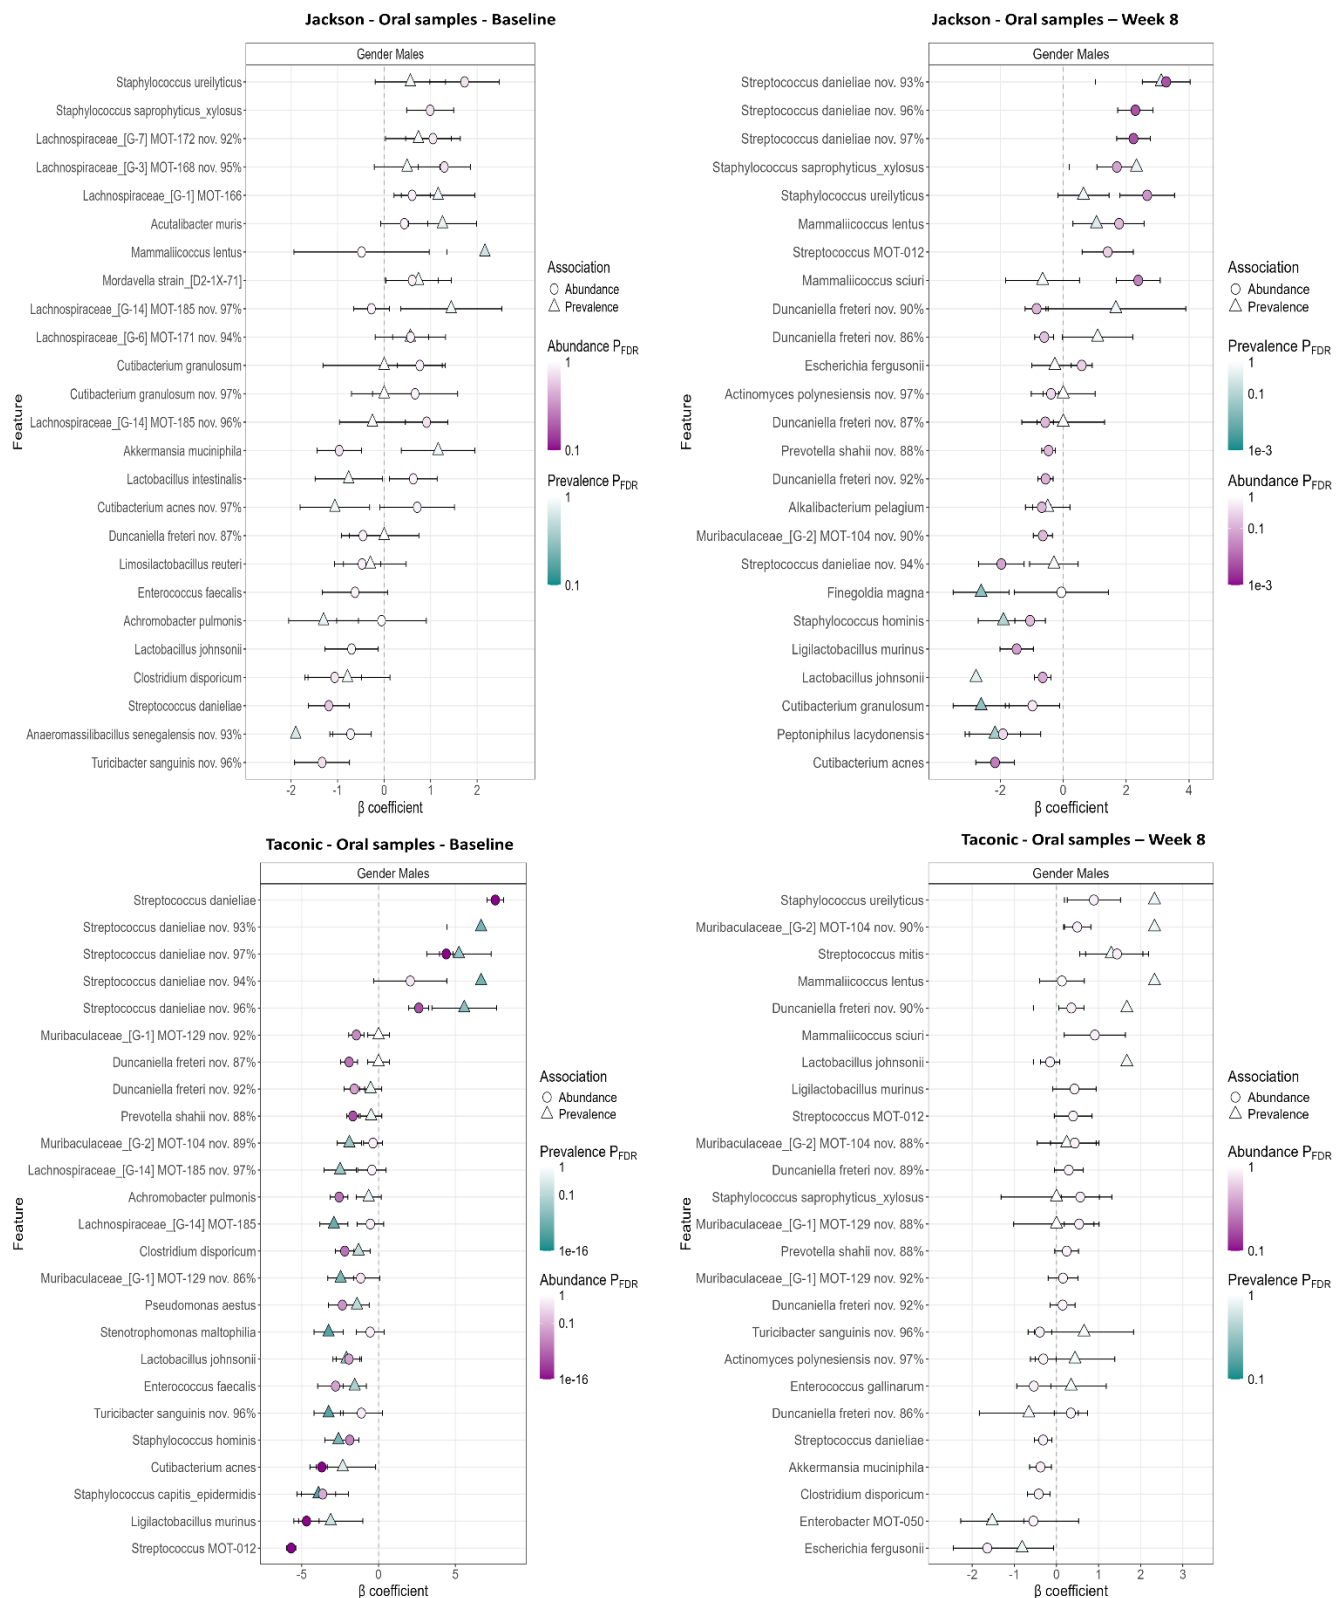

**Supplementary Figure 13. Differentially abundant/prevalent species by sex (Males vs. Females) stratified by vendor and 4NQO treatment (time point) –Oral samples.** Centered log ratio (CLR) transformed data were analyzed with Multivariate Association with Linear Models (MaAsLin3 package in R) to identify differentially abundant species ( $FDR \leq 0.1$ ).
